# Supplementary material for: Characterization of a Reservoir-Style Implant for Sustained Release of Tenofovir Alafenamide (TAF) for HIV Pre-Exposure Prophylaxis (PrEP)
Source: PubMed Central journal article supplement (PMC6680758; doi:10.3390/pharmaceutics11070315), 2019-07-04
Supplement: pharmaceutics-11-00315-s001.pdf [file pharmaceutics-11-00315-s001.pdf]

# Supplementary Materials: Characterization of a Reservoir-Style Implant for Sustained Release of Tenofovir Alafenamide (TAF) for HIV Pre-Exposure Prophylaxis (PrEP)

Leah M. Johnson \*, Sai Archana Krovi, Linying Li, Natalie Girouard, Zach R. Demkovich, Daniel Myers, Ben Creelman and Ariane van der Straten

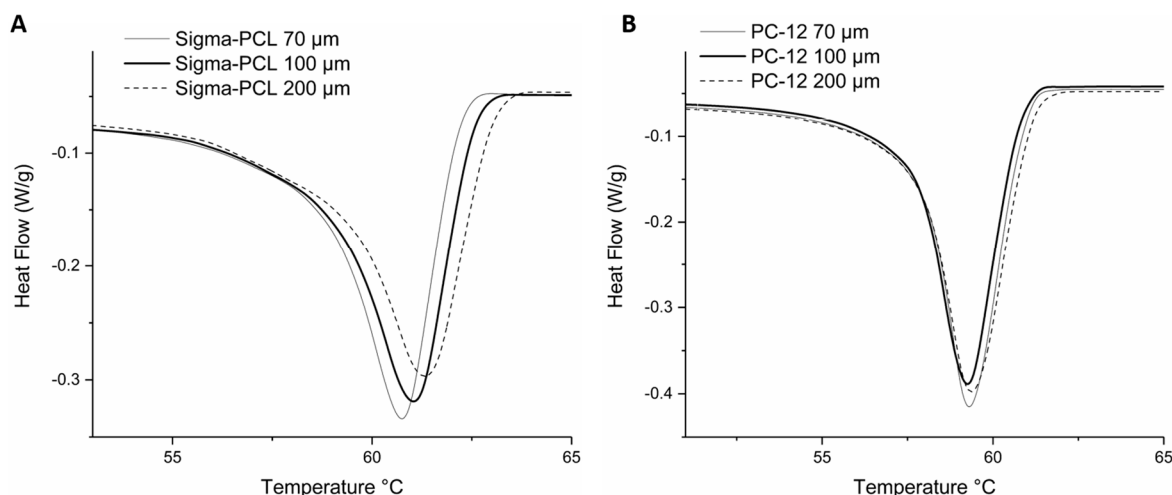

**Figure S1.** Heat flow versus temperature for extruded tubes comprising (A) Sigma-PCL and (B) PC-12 at different tube thicknesses.

**Table S1.** Stability of TAF in implants at different timepoints within in vitro conditions \*.

| Days | % Stability |
|------|-------------|
| 90   | 97.1 ± 0.09 |
| 120  | 96.5 ± 0.17 |
| 15   | 92.5 ± 0.53 |
| 180  | 89.2 ± 0.84 |

\* Implants comprise Sigma-PCL of 100 µm wall thickness, 2.5 mm OD, and 40 mm length containing a 2:1 TAF-Castor Oil formulation. Implants were not gamma-irradiated.

**Table S2.** GPC Analysis of PCL.

| Type of PCL                                    |             | Sigma-PCL | PC-12 |
|------------------------------------------------|-------------|-----------|-------|
| PCL raw material without gamma irradiation     | $M_n$ (kDa) | 103       | 51    |
|                                                | $M_w$ (kDa) | 148       | 89    |
| PCL extruded tubes * without gamma irradiation | $M_n$ (kDa) | 98        | 52    |
|                                                | $M_w$ (kDa) | 145       | 88    |
| PCL extruded tubes * after gamma irradiation   | $M_n$ (kDa) | 70        | 41    |
|                                                | $M_w$ (kDa) | 119       | 77    |

\* Wall thickness of PCL tubes of 70 µm
